# Supplementary material for: A bilayered two-dimensional hybrid perovskite with a cage-templated secondary cation for high efficiency photodetection
Source: Royal Society of Chemistry journal article supplement (doi:10.1039/d1qi01326b), 2021-12-20
Supplement: d1qi01326b1.pdf [file d1qi01326b1.pdf]

## Supporting Information

### Bilayered Two-Dimensional Hybrid Perovskite with the Cage-Templated Secondary Cation for High Efficiency Photodetection

Liwei Tang,<sup>a,b</sup> Huaixi Chen,<sup>b</sup> Yu Ma,<sup>b</sup> Yi Liu,<sup>b</sup> Lina Hua,<sup>b</sup> Beibei Wang,<sup>b</sup> Lei Lu,<sup>b</sup> Zhihua Sun,<sup>\*b</sup> Junhua Luo<sup>b</sup>

<sup>a</sup> College of Chemistry and Materials Science, Fujian Normal University, Fuzhou, 350007, P. R. China

<sup>b</sup> State Key Laboratory of Structural Chemistry, Fujian Institute of Research on the Structure of Matter, Chinese Academy of Sciences, Fuzhou, Fujian 350002, P. R. China

\*Correspondence: sunzhihua@fjirsm.ac.cn

#### Table of Contents:

##### Figure:

**Figure S1.** Single-crystal sample of **1**. .....-2

**Figure S2.** The inorganic perovskite bilayers are connected with organic IA<sup>+</sup> cation layers by weak N-H...Br hydrogen bonds. ....-2-

**Figure S3.** XRD patterns of crystal wafer. ....-3-

**Figure S4.** Powder X-ray diffraction patterns of **1** recorded on the sample after 1 day and 100 days. ....-3-

**Figure S5.** Thermogravimetric (TG) curve of **1**. ....-4-

##### Table:

**Table S1.** Crystal data for **1**. ....-5-

**Table S2.** Bond lengths for **1**. ....-6-

**Table S3.** Bond angles for **1**. ....-6-

**Table S4.** N-H...Br Hydrogen bonds of **1**. ....-7-

**Table S5.** Parameter comparison of photodetectors using different materials .....-7-

Figure

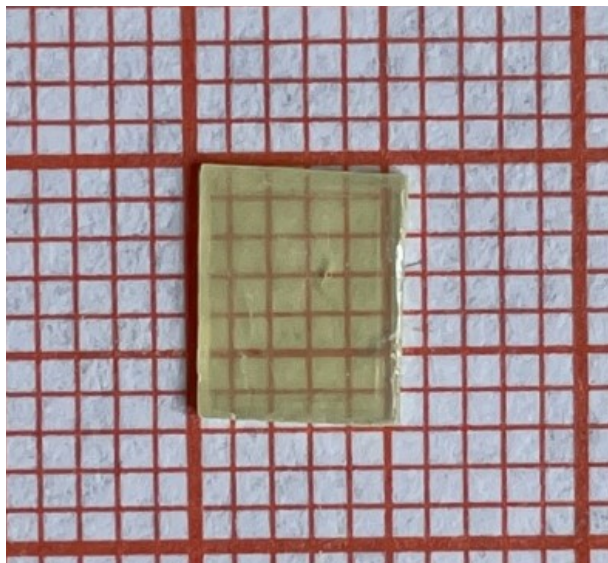

Figure S1. Single-crystal sample of **1**.

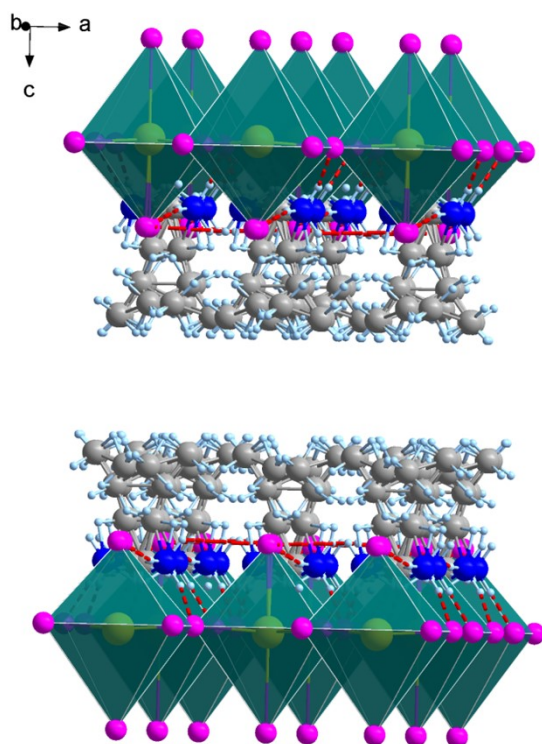

Figure S2. The inorganic perovskite bilayers are connected with organic  $IA^+$  cation layers by weak  $N-H\cdots Br$  hydrogen bonds.

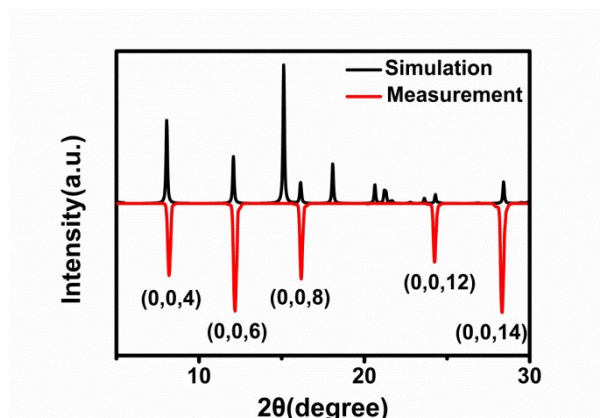

**Figure S3.** XRD patterns of crystal wafer.

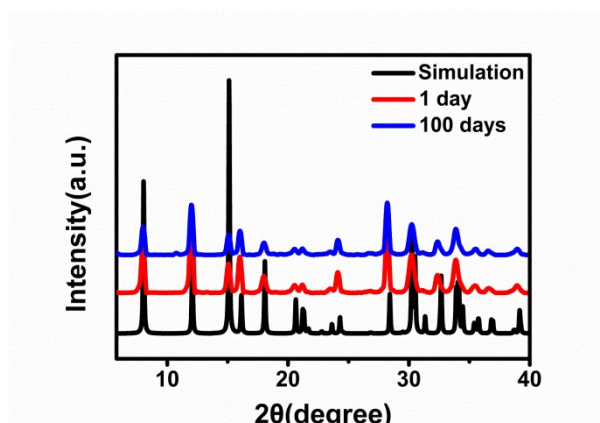

**Figure S4.** Powder X-ray diffraction patterns of **1** recorded on the sample after 1 day and 100 days, respectively.

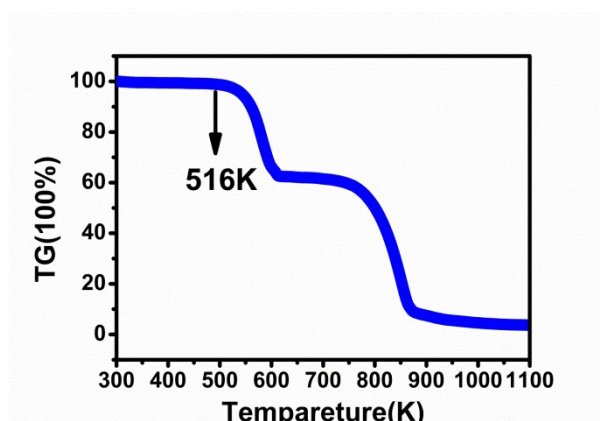

**Figure S5.** Thermogravimetric (TG) curve of **1**.

**Table S1** Crystal data for **1**.

---

|                                                                   |                                                                                            |
|-------------------------------------------------------------------|--------------------------------------------------------------------------------------------|
| Empirical formula                                                 | C <sub>12</sub> H <sub>36</sub> Br <sub>7</sub> N <sub>3</sub> Pb <sub>2</sub>             |
| Formula weight                                                    | 1196.19                                                                                    |
| Temperature/K                                                     | 249.99                                                                                     |
| Crystal system, space group                                       | Orthorhombic, <i>Fmmm</i>                                                                  |
| <i>a</i> /Å                                                       | 8.333(2)                                                                                   |
| <i>b</i> /Å                                                       | 8.372(2)                                                                                   |
| <i>c</i> /Å                                                       | 43.928(12)                                                                                 |
| $\beta$ /°                                                        | 90                                                                                         |
| Volume/Å <sup>3</sup>                                             | 3064.7(14)                                                                                 |
| <i>Z</i> , $\rho_{\text{calc}}$ /cm <sup>3</sup>                  | 2, 2.593                                                                                   |
| $\mu$ /mm <sup>-1</sup>                                           | 20.103                                                                                     |
| <i>F</i> (000)                                                    | 2152.0                                                                                     |
| Radiation                                                         | MoK $\alpha$ ( $\lambda$ = 0.71073)                                                        |
| 2- $\theta$ range for data collection(°)                          | 6.962 to 55.156                                                                            |
| Index ranges                                                      | -8 $\leq$ <i>h</i> $\leq$ 10, -10 $\leq$ <i>k</i> $\leq$ 10, -53 $\leq$ <i>l</i> $\leq$ 56 |
| Reflections collected                                             | 5089                                                                                       |
| Independent reflections                                           | 1016 [ <i>R</i> <sub>int</sub> = 0.0860, <i>R</i> <sub>sigma</sub> = 0.0686]               |
| Data/restraints/parameters                                        | 1016/111/105                                                                               |
| Goodness-of-fit on <i>F</i> <sup>2</sup>                          | 1.090                                                                                      |
| Final <i>R</i> indexes [ <i>I</i> $\geq$ 2 $\sigma$ ( <i>I</i> )] | <i>R</i> <sub>1</sub> = 0.0870, w <i>R</i> <sub>2</sub> = 0.2396                           |
| Final <i>R</i> indexes [all data]                                 | <i>R</i> <sub>1</sub> = 0.1093, w <i>R</i> <sub>2</sub> = 0.2581                           |
| Largest diff. peak/hole / e Å <sup>-3</sup>                       | 1.92/-1.97                                                                                 |

---

**Table S2.** Bond lengths of **1** at 250K.

| Atom | Atom             | Length/Å   | Atom | Atom | Length/Å  |
|------|------------------|------------|------|------|-----------|
| Pb1  | Br2 <sup>1</sup> | 2.9566(6)  | C1   | C2   | 1.487(11) |
| Pb1  | Br2              | 2.9566(6)  | C1   | N1   | 1.497(12) |
| Pb1  | Br2 <sup>2</sup> | 2.9566(6)  | C2   | C3   | 1.490(11) |
| Pb1  | Br2 <sup>3</sup> | 2.9566(6)  | C3   | C5   | 1.504(12) |
| Pb1  | Br1 <sup>4</sup> | 2.803(3)   | C3   | C4   | 1.505(13) |
| Pb1  | Br1              | 2.803(3)   | C7   | N2   | 1.501(13) |
| Pb1  | Br3              | 3.1930(11) | N2   | C6   | 1.497(14) |
| Br1  | Br1 <sup>4</sup> | 0.809(6)   |      |      |           |

<sup>1</sup>1-x,+y,+z; <sup>2</sup>-1/2+x,1/2+y,+z; <sup>3</sup>3/2-x,1/2+y,+z; <sup>4</sup>1-x,1-y,+z
**Table S3.** Bond angles of **1** at 250K.

| bond                                   | Angle/°    | Bond                      | Angle/°    |
|----------------------------------------|------------|---------------------------|------------|
| Br2 <sup>1</sup> -Pb1-Br2              | 89.60(2)   | Br1-Pb1-Br2 <sup>1</sup>  | 81.37(7)   |
| Br2-Pb1-Br2 <sup>2</sup>               | 174.46(11) | Br1-Pb1-Br2 <sup>3</sup>  | 93.11(7)   |
| Br2 <sup>1</sup> -Pb1-Br2 <sup>3</sup> | 174.46(11) | Br1-Pb1-Br2 <sup>2</sup>  | 93.11(7)   |
| Br2 <sup>3</sup> -Pb1-Br2 <sup>2</sup> | 89.60(2)   | Br1 <sup>4</sup> -Pb1-Br1 | 16.60(12)  |
| Br2 <sup>1</sup> -Pb1-Br2 <sup>2</sup> | 90.13(2)   | Br1-Pb1-Br3               | 171.70(6)  |
| Br2-Pb1-Br2 <sup>3</sup>               | 90.13(2)   | Br1 <sup>4</sup> -Pb1-Br3 | 171.70(6)  |
| Br2 <sup>1</sup> -Pb1-Br3              | 92.77(5)   | Pb1 <sup>5</sup> -Br2-Pb1 | 174.46(11) |
| Br2 <sup>3</sup> -Pb1-Br3              | 92.77(5)   | Br1 <sup>4</sup> -Br1-Pb1 | 81.70(6)   |
| Br2 <sup>2</sup> -Pb1-Br3              | 92.77(5)   | Pb1-Br3-Pb1 <sup>6</sup>  | 180.0      |
| Br2-Pb1-Br3                            | 92.77(5)   | C2-C1-N1                  | 113.1(9)   |
| Br1 <sup>4</sup> -Pb1-Br2 <sup>2</sup> | 81.37(7)   | C1-C2-C3                  | 117.8(8)   |
| Br1 <sup>4</sup> -Pb1-Br2 <sup>1</sup> | 93.11(7)   | C2-C3-C5                  | 115.8(10)  |
| Br1-Pb1-Br2                            | 81.37(7)   | C2-C3-C4                  | 104.2(9)   |
| Br1 <sup>4</sup> -Pb1-Br2 <sup>3</sup> | 81.37(7)   | C5-C3-C4                  | 110.0(9)   |
| Br1 <sup>4</sup> -Pb1-Br2              | 93.11(7)   | C6-N2-C7                  | 111.5(10)  |

<sup>1</sup>1-x,+y,+z; <sup>2</sup>-1/2+x,1/2+y,+z; <sup>3</sup>3/2-x,1/2+y,+z; <sup>4</sup>1-x,1-y,+z; <sup>5</sup>1/2+x,-1/2+y,+z; <sup>6</sup>1-x,1-y,1

**Table S4** N-H...Br Hydrogen bonds of **1** at 250K.

| D-H                                     | d(D-H) | d(H..A) | <DHA   | d(D..A) |
|-----------------------------------------|--------|---------|--------|---------|
| N1 <sup>a</sup> -H1C...Br1 <sup>1</sup> | 0.900  | 2.765   | 167.66 | 3.649   |
| N1 <sup>a</sup> -H1C...Br1 <sup>2</sup> | 0.900  | 2.012   | 165.96 | 2.893   |
| N1 <sup>a</sup> -H1D...Br2 <sup>3</sup> | 0.900  | 1.761   | 137.07 | 2.497   |
| N1 <sup>a</sup> -H1E...Br1              | 0.900  | 2.736   | 124.31 | 3.327   |
| N1 <sup>a</sup> -H1E...Br1 <sup>4</sup> | 0.900  | 3.011   | 123.87 | 3.591   |
| N2 <sup>a</sup> -H2C...Br3 <sup>5</sup> | 0.900  | 2.288   | 138.17 | 3.019   |
| N2 <sup>a</sup> -H2D...Br2 <sup>6</sup> | 0.900  | 2.530   | 159.37 | 3.387   |

<sup>1</sup>x-1/2, y-1/2, z; <sup>2</sup>-x+1/2, -y+1/2, z; <sup>3</sup>-x+1, y, z; <sup>4</sup>-x+1, -y+1, z; <sup>5</sup>-x+1, -y+1, -z+1; <sup>6</sup>x-1/2, y+1/2, z

**Table S5.** Parameter comparison of photodetectors using different materials

| Photodetectors                                                                                                                  | Responsivity<br>(mA W <sup>-1</sup> ) | Detectivity<br>(Jones)  | Ref      |
|---------------------------------------------------------------------------------------------------------------------------------|---------------------------------------|-------------------------|----------|
| (IA) <sub>2</sub> (DMA)Pb <sub>2</sub> Br <sub>7</sub>                                                                          | 110                                   | 2.8 × 10 <sup>11</sup>  | Our work |
| (C <sub>5</sub> H <sub>11</sub> NH <sub>3</sub> ) <sub>2</sub> (CH <sub>3</sub> NH <sub>3</sub> )Pb <sub>2</sub> I <sub>7</sub> | 3.8                                   | 2.9 × 10 <sup>10</sup>  | 1        |
| (C <sub>4</sub> H <sub>9</sub> NH <sub>3</sub> ) <sub>2</sub> (MA) <sub>2</sub> Pb <sub>3</sub> Br <sub>10</sub>                | -                                     | 3.6 × 10 <sup>10</sup>  | 2        |
| (iso-BA) <sub>2</sub> PbI <sub>4</sub>                                                                                          | 560                                   | 1.23 × 10 <sup>10</sup> | 3        |
| (BA) <sub>2</sub> (GA)Pb <sub>2</sub> I <sub>7</sub>                                                                            | 12.01                                 | 3.3 × 10 <sup>11</sup>  | 4        |
| (iso-BA) <sub>2</sub> (MA)Pb <sub>2</sub> I <sub>7</sub>                                                                        | 12.1                                  | 1.05 × 10 <sup>11</sup> | 5        |
| (HDA)CsPb <sub>2</sub> Br <sub>7</sub>                                                                                          | 210                                   | 1.5 × 10 <sup>9</sup>   | 6        |

[1] S. Han, P. Wang, J. Zhang, X. Liu, Z. Sun, X. Huang, L. Li, C. Ji, W. Zhang, B. Teng, W. Hu, M. Hong, J. Luo, *Laser Photonics Rev.*, 2018, **12**, 1800060-1800060.

- [2] L. Li, Z. Sun, P. Wang, W. Hu, S. Wang, C. Ji, M. Hong, J. Luo, *Angew. Chem.*, 2017, **56**, 12150-12154.
- [3] L. Li, L. Jin, Y. Zhou, J. Li, J. Ma, S. Wang, W. Li and D. Li, *Adv. Opt. Mater.*, 2019, **7**, 1900988-1900995.
- [4] L. Lu, Y. Ma, J. Wang, Y. Liu, S. Han, X. Liu, W. Guo, H. Xu, J. Luo and Z. Sun, *Chem. Eur. J.*, 2021, **27**, 9267-9271.
- [5] Y. Liu, Z. Wu, X. Liu, S. Han, Y. Li, T. Yang, Y. Ma, M. Hong, J. Luo, and Z. Sun, *Adv. Opt Mater.*, 2019, **7**, 1901049-1901054.
- [6] T. Yang, Y. Li, S. Han, Z. Xu, Yi Liu, X. Zhang, X. Liu, B. Teng, J. Luo, and Z. Sun, *Small*, 2020, **16**, 1907020-1907025.
